# Supplementary material for: FTY720 Protects Against Ischemia–Reperfusion Injury by Preventing the Redistribution of Tight Junction Proteins and Decreases Inflammation in the Subacute Phase in an Experimental Stroke Model
Source: Springer Nature journal article supplement (doi:10.1007/s12975-020-00789-x), 2020-02-27
Supplement: MOESM1 [file 12975_2020_789_MOESM1_ESM.xlsx]

## Sheet: Sheet2
GAPDH	F: AGGTCGGAGTGAACGGATTC
	R: TGCCGTGGGTGGAATCATAC
ZO-1	F: CAAGTTCCCGGCCTAGTAGA,
	R: CCCGAGGTTCACTTTTTGCG
Occludin	F: GAACGCCGAGTAGCCCTCGC
	R: GCAGCCATGGCCAGCAGGAAT
Claudin5	F: CGTGCCCATGTCTCAGAAGT
	R: TCACCGGGAAGCTGAAATCC
VE-cadherin	F: AGCGATGGATGCAGATGACC
	R: ATGAGTCCAGAACCACGGATG
